# Supplementary material
Source: MDPI journal article supplement (https://www.mdpi.com/2311-7524/9/3/297)
Supplement: s1 [file s1]

**IAA content (Figure S1)**

| Treatments | Time | repetition | IAA content<br>( $\mu\text{mol}\cdot\text{g}^{-1}\text{FW}$ ) | mean | standard<br>error | significant<br>difference<br>between<br>treatments | significant<br>difference<br>between<br>full data |
|------------|------|------------|---------------------------------------------------------------|------|-------------------|----------------------------------------------------|---------------------------------------------------|
| CK         | 24 h | 1          | 0.169                                                         | 0.16 | 0.01              | b                                                  | B                                                 |
|            |      | 2          | 0.157                                                         |      |                   |                                                    |                                                   |
|            |      | 3          | 0.144                                                         |      |                   |                                                    |                                                   |
| L          |      | 1          | 0.166                                                         | 0.16 | 0.01              | b                                                  | B                                                 |
|            |      | 2          | 0.145                                                         |      |                   |                                                    |                                                   |
|            |      | 3          | 0.164                                                         |      |                   |                                                    |                                                   |
| L+S        |      | 1          | 0.185                                                         | 0.18 | 0.00              | a                                                  | A                                                 |
|            |      | 2          | 0.171                                                         |      |                   |                                                    |                                                   |
|            |      | 3          | 0.178                                                         |      |                   |                                                    |                                                   |
| L+S+TIBA   |      | 1          | 0.134                                                         | 0.13 | 0.00              | c                                                  | C                                                 |
|            |      | 2          | 0.136                                                         |      |                   |                                                    |                                                   |
|            |      | 3          | 0.132                                                         |      |                   |                                                    |                                                   |
| L+S+BBO    |      | 1          | 0.139                                                         | 0.13 | 0.00              | c                                                  | C                                                 |
|            |      | 2          | 0.130                                                         |      |                   |                                                    |                                                   |
|            |      | 3          | 0.133                                                         |      |                   |                                                    |                                                   |
| CK         | 48 h | 1          | 0.120                                                         | 0.12 | 0.00              | a                                                  | C                                                 |
|            |      | 2          | 0.129                                                         |      |                   |                                                    |                                                   |
|            |      | 3          | 0.114                                                         |      |                   |                                                    |                                                   |
| L          |      | 1          | 0.086                                                         | 0.09 | 0.00              | c                                                  | E                                                 |
|            |      | 2          | 0.099                                                         |      |                   |                                                    |                                                   |
|            |      | 3          | 0.092                                                         |      |                   |                                                    |                                                   |
| L+S        |      | 1          | 0.103                                                         | 0.11 | 0.00              | b                                                  | D                                                 |
|            |      | 2          | 0.111                                                         |      |                   |                                                    |                                                   |
|            |      | 3          | 0.103                                                         |      |                   |                                                    |                                                   |
| L+S+TIBA   |      | 1          | 0.073                                                         | 0.08 | 0.00              | cd                                                 | F                                                 |
|            |      | 2          | 0.080                                                         |      |                   |                                                    |                                                   |
|            |      | 3          | 0.080                                                         |      |                   |                                                    |                                                   |
| L+S+BBO    |      | 1          | 0.070                                                         | 0.07 | 0.00              | d                                                  | F                                                 |
|            |      | 2          | 0.064                                                         |      |                   |                                                    |                                                   |
|            |      | 3          | 0.078                                                         |      |                   |                                                    |                                                   |

**Sucrose content (Figure S2a)**

| Treatments | Time | repetition | Sucrose<br>content<br>(mg g <sup>-1</sup> FW) | mean | standard<br>error | significant<br>difference<br>between<br>treatments | significant<br>difference<br>between<br>full data |
|------------|------|------------|-----------------------------------------------|------|-------------------|----------------------------------------------------|---------------------------------------------------|
| CK         | 24 h | 1          | 1.5729                                        | 1.57 | 0.167             | c                                                  | F                                                 |
|            |      | 2          | 1.8622                                        |      |                   |                                                    |                                                   |
|            |      | 3          | 1.2836                                        |      |                   |                                                    |                                                   |
| L          |      | 1          | 2.3301                                        | 2.40 | 0.041             | b                                                  | DE                                                |
|            |      | 2          | 2.4030                                        |      |                   |                                                    |                                                   |
|            |      | 3          | 2.4729                                        |      |                   |                                                    |                                                   |
| L+S        |      | 1          | 2.7654                                        | 2.79 | 0.012             | a                                                  | C                                                 |
|            |      | 2          | 2.7865                                        |      |                   |                                                    |                                                   |
|            |      | 3          | 2.8077                                        |      |                   |                                                    |                                                   |
| L+S+TIBA   |      | 1          | 2.5019                                        | 2.58 | 0.043             | b                                                  | CD                                                |
|            |      | 2          | 2.5772                                        |      |                   |                                                    |                                                   |
|            |      | 3          | 2.6525                                        |      |                   |                                                    |                                                   |
| L+S+BBO    |      | 1          | 2.4636                                        | 2.40 | 0.034             | b                                                  | DE                                                |
|            |      | 2          | 2.3487                                        |      |                   |                                                    |                                                   |
|            |      | 3          | 2.3907                                        |      |                   |                                                    |                                                   |
| CK         | 48 h | 1          | 2.2761                                        | 2.27 | 0.008             | d                                                  | E                                                 |
|            |      | 2          | 2.2790                                        |      |                   |                                                    |                                                   |
|            |      | 3          | 2.2542                                        |      |                   |                                                    |                                                   |
| L          |      | 1          | 3.2919                                        | 3.08 | 0.121             | b                                                  | B                                                 |
|            |      | 2          | 3.0816                                        |      |                   |                                                    |                                                   |
|            |      | 3          | 2.8714                                        |      |                   |                                                    |                                                   |
| L+S        |      | 1          | 3.4346                                        | 3.40 | 0.034             | a                                                  | A                                                 |
|            |      | 2          | 3.4262                                        |      |                   |                                                    |                                                   |
|            |      | 3          | 3.3277                                        |      |                   |                                                    |                                                   |
| L+S+TIBA   |      | 1          | 2.6631                                        | 2.56 | 0.054             | c                                                  | CD                                                |
|            |      | 2          | 2.5469                                        |      |                   |                                                    |                                                   |
|            |      | 3          | 2.4790                                        |      |                   |                                                    |                                                   |
| L+S+BBO    |      | 1          | 2.6815                                        | 2.72 | 0.025             | c                                                  | C                                                 |
|            |      | 2          | 2.7681                                        |      |                   |                                                    |                                                   |
|            |      | 3          | 2.7248                                        |      |                   |                                                    |                                                   |

**Glucose content (Figure S2b)**

| Treatments | Time | repetition | Glucose content<br>(mg g <sup>-1</sup> FW) | mean | standard<br>error | significant<br>difference<br>between<br>treatments | significant<br>difference<br>between<br>full data |
|------------|------|------------|--------------------------------------------|------|-------------------|----------------------------------------------------|---------------------------------------------------|
| CK         | 24 h | 1          | 0.2781                                     | 0.31 | 0.02              | c                                                  | D                                                 |
|            |      | 2          | 0.3138                                     |      |                   |                                                    |                                                   |
|            |      | 3          | 0.3494                                     |      |                   |                                                    |                                                   |
| L          |      | 1          | 0.4188                                     | 0.42 | 0.01              | ab                                                 | BC                                                |
|            |      | 2          | 0.4141                                     |      |                   |                                                    |                                                   |
|            |      | 3          | 0.4329                                     |      |                   |                                                    |                                                   |
| L+S        |      | 1          | 0.4768                                     | 0.46 | 0.01              | a                                                  | B                                                 |
|            |      | 2          | 0.4581                                     |      |                   |                                                    |                                                   |
|            |      | 3          | 0.4394                                     |      |                   |                                                    |                                                   |
| L+S+TIBA   |      | 1          | 0.4146                                     | 0.46 | 0.03              | a                                                  | B                                                 |
|            |      | 2          | 0.4589                                     |      |                   |                                                    |                                                   |
|            |      | 3          | 0.5032                                     |      |                   |                                                    |                                                   |
| L+S+BBO    |      | 1          | 0.4018                                     | 0.40 | 0.00              | b                                                  | C                                                 |
|            |      | 2          | 0.3932                                     |      |                   |                                                    |                                                   |
|            |      | 3          | 0.3929                                     |      |                   |                                                    |                                                   |
| CK         | 48 h | 1          | 0.4069                                     | 0.40 | 0.01              | c                                                  | C                                                 |
|            |      | 2          | 0.3758                                     |      |                   |                                                    |                                                   |
|            |      | 3          | 0.4058                                     |      |                   |                                                    |                                                   |
| L          |      | 1          | 0.5474                                     | 0.51 | 0.02              | b                                                  | A                                                 |
|            |      | 2          | 0.4925                                     |      |                   |                                                    |                                                   |
|            |      | 3          | 0.5047                                     |      |                   |                                                    |                                                   |
| L+S        |      | 1          | 0.5470                                     | 0.55 | 0.00              | a                                                  | A                                                 |
|            |      | 2          | 0.5497                                     |      |                   |                                                    |                                                   |
|            |      | 3          | 0.5444                                     |      |                   |                                                    |                                                   |
| L+S+TIBA   |      | 1          | 0.5383                                     | 0.53 | 0.01              | ab                                                 | A                                                 |
|            |      | 2          | 0.5206                                     |      |                   |                                                    |                                                   |
|            |      | 3          | 0.5277                                     |      |                   |                                                    |                                                   |
| L+S+BBO    |      | 1          | 0.4885                                     | 0.51 | 0.01              | b                                                  | A                                                 |
|            |      | 2          | 0.5242                                     |      |                   |                                                    |                                                   |
|            |      | 3          | 0.5063                                     |      |                   |                                                    |                                                   |

### Fructose content (Figure S2c)

| Treatments | Time | repetition | Fructose content<br>(mg g <sup>-1</sup> FW) | mean | standard error | significant difference between treatments | significant difference between full data |
|------------|------|------------|---------------------------------------------|------|----------------|-------------------------------------------|------------------------------------------|
| CK         | 24 h | 1          | 0.3141                                      | 0.32 | 0.00           | e                                         | G                                        |
|            |      | 2          | 0.3178                                      |      |                |                                           |                                          |
|            |      | 3          | 0.3215                                      |      |                |                                           |                                          |
| L          |      | 1          | 0.3572                                      | 0.36 | 0.00           | d                                         | F                                        |
|            |      | 2          | 0.3686                                      |      |                |                                           |                                          |
|            |      | 3          | 0.3636                                      |      |                |                                           |                                          |
| L+S        |      | 1          | 0.4175                                      | 0.42 | 0.00           | c                                         | E                                        |
|            |      | 2          | 0.4306                                      |      |                |                                           |                                          |
|            |      | 3          | 0.4203                                      |      |                |                                           |                                          |
| L+S+TIBA   |      | 1          | 0.4929                                      | 0.49 | 0.01           | a                                         | C                                        |
|            |      | 2          | 0.5084                                      |      |                |                                           |                                          |
|            |      | 3          | 0.4774                                      |      |                |                                           |                                          |
| L+S+BBO    |      | 1          | 0.4679                                      | 0.46 | 0.00           | b                                         | D                                        |
|            |      | 2          | 0.4600                                      |      |                |                                           |                                          |
|            |      | 3          | 0.4549                                      |      |                |                                           |                                          |
| CK         | 48 h | 1          | 0.4596                                      | 0.45 | 0.01           | c                                         | D                                        |
|            |      | 2          | 0.4343                                      |      |                |                                           |                                          |
|            |      | 3          | 0.4469                                      |      |                |                                           |                                          |
| L          |      | 1          | 0.5805                                      | 0.59 | 0.00           | b                                         | B                                        |
|            |      | 2          | 0.5907                                      |      |                |                                           |                                          |
|            |      | 3          | 0.5911                                      |      |                |                                           |                                          |
| L+S        |      | 1          | 0.6540                                      | 0.65 | 0.00           | a                                         | A                                        |
|            |      | 2          | 0.6453                                      |      |                |                                           |                                          |
|            |      | 3          | 0.6432                                      |      |                |                                           |                                          |
| L+S+TIBA   |      | 1          | 0.5996                                      | 0.60 | 0.00           | b                                         | B                                        |
|            |      | 2          | 0.5901                                      |      |                |                                           |                                          |
|            |      | 3          | 0.5956                                      |      |                |                                           |                                          |
| L+S+BBO    |      | 1          | 0.5889                                      | 0.60 | 0.00           | b                                         | B                                        |
|            |      | 2          | 0.5962                                      |      |                |                                           |                                          |
|            |      | 3          | 0.6035                                      |      |                |                                           |                                          |

**Sorbitol content (Figure S2d)**

| Treatments | Time | repetition | Sorbitol<br>content<br>(mg g <sup>-1</sup> FW) | mean | standard<br>error | significant<br>difference<br>between<br>treatments | significant<br>difference<br>between<br>full data |
|------------|------|------------|------------------------------------------------|------|-------------------|----------------------------------------------------|---------------------------------------------------|
| CK         | 24 h | 1          | 3.3054                                         | 3.43 | 0.07              | d                                                  | G                                                 |
|            |      | 2          | 3.4252                                         |      |                   |                                                    |                                                   |
|            |      | 3          | 3.5450                                         |      |                   |                                                    |                                                   |
| L          |      | 1          | 4.0592                                         | 4.06 | 0.01              | c                                                  | EF                                                |
|            |      | 2          | 4.0397                                         |      |                   |                                                    |                                                   |
|            |      | 3          | 4.0787                                         |      |                   |                                                    |                                                   |
| L+S        |      | 1          | 4.6826                                         | 4.68 | 0.01              | a                                                  | D                                                 |
|            |      | 2          | 4.6979                                         |      |                   |                                                    |                                                   |
|            |      | 3          | 4.6672                                         |      |                   |                                                    |                                                   |
| L+S+TIBA   |      | 1          | 3.1003                                         | 3.28 | 0.09              | d                                                  | G                                                 |
|            |      | 2          | 3.3427                                         |      |                   |                                                    |                                                   |
|            |      | 3          | 3.3834                                         |      |                   |                                                    |                                                   |
| L+S+BBO    |      | 1          | 4.2597                                         | 4.20 | 0.04              | b                                                  | E                                                 |
|            |      | 2          | 4.2316                                         |      |                   |                                                    |                                                   |
|            |      | 3          | 4.1203                                         |      |                   |                                                    |                                                   |
| CK         | 48 h | 1          | 3.8458                                         | 3.85 | 0.01              | d                                                  | F                                                 |
|            |      | 2          | 3.8666                                         |      |                   |                                                    |                                                   |
|            |      | 3          | 3.8250                                         |      |                   |                                                    |                                                   |
| L          |      | 1          | 5.5330                                         | 5.50 | 0.02              | b                                                  | B                                                 |
|            |      | 2          | 5.4624                                         |      |                   |                                                    |                                                   |
|            |      | 3          | 5.4977                                         |      |                   |                                                    |                                                   |
| L+S        |      | 1          | 5.8980                                         | 5.90 | 0.03              | a                                                  | A                                                 |
|            |      | 2          | 5.8436                                         |      |                   |                                                    |                                                   |
|            |      | 3          | 5.9523                                         |      |                   |                                                    |                                                   |
| L+S+TIBA   |      | 1          | 5.4538                                         | 5.13 | 0.19              | c                                                  | C                                                 |
|            |      | 2          | 4.8115                                         |      |                   |                                                    |                                                   |
|            |      | 3          | 5.1326                                         |      |                   |                                                    |                                                   |
| L+S+BBO    |      | 1          | 4.7816                                         | 4.97 | 0.10              | c                                                  | C                                                 |
|            |      | 2          | 5.1257                                         |      |                   |                                                    |                                                   |
|            |      | 3          | 5.0063                                         |      |                   |                                                    |                                                   |

**MDA content (Figure S3)**

| Treatments | Time | repetition | MDA content<br>(nmol g <sup>-1</sup> Fw) | mean  | standard<br>error | significant<br>difference<br>between<br>treatments | significant<br>difference<br>between<br>full data |
|------------|------|------------|------------------------------------------|-------|-------------------|----------------------------------------------------|---------------------------------------------------|
| CK         | 24h  | 1          | 31.6994                                  | 30.46 | 0.80              | b                                                  | D                                                 |
|            |      | 2          | 30.7320                                  |       |                   |                                                    |                                                   |
|            |      | 3          | 28.9522                                  |       |                   |                                                    |                                                   |
| L          |      | 1          | 38.4904                                  | 39.14 | 1.08              | a                                                  | BC                                                |
|            |      | 2          | 41.2373                                  |       |                   |                                                    |                                                   |
|            |      | 3          | 37.6852                                  |       |                   |                                                    |                                                   |
| L+S        |      | 1          | 35.3871                                  | 30.21 | 2.59              | b                                                  | D                                                 |
|            |      | 2          | 27.6763                                  |       |                   |                                                    |                                                   |
|            |      | 3          | 27.5762                                  |       |                   |                                                    |                                                   |
| L+S+TIBA   |      | 1          | 37.3683                                  | 36.71 | 0.38              | a                                                  | C                                                 |
|            |      | 2          | 36.7091                                  |       |                   |                                                    |                                                   |
|            |      | 3          | 36.0500                                  |       |                   |                                                    |                                                   |
| L+S+BBO    |      | 1          | 37.0391                                  | 36.99 | 0.16              | a                                                  | C                                                 |
|            |      | 2          | 36.6850                                  |       |                   |                                                    |                                                   |
|            |      | 3          | 37.2341                                  |       |                   |                                                    |                                                   |
| CK         | 48h  | 1          | 36.4390                                  | 35.49 | 1.52              | b                                                  | C                                                 |
|            |      | 2          | 32.5010                                  |       |                   |                                                    |                                                   |
|            |      | 3          | 37.5192                                  |       |                   |                                                    |                                                   |
| L          |      | 1          | 44.5029                                  | 46.22 | 1.64              | a                                                  | A                                                 |
|            |      | 2          | 49.5090                                  |       |                   |                                                    |                                                   |
|            |      | 3          | 44.6569                                  |       |                   |                                                    |                                                   |
| L+S        |      | 1          | 37.1707                                  | 37.23 | 0.04              | b                                                  | C                                                 |
|            |      | 2          | 37.2320                                  |       |                   |                                                    |                                                   |
|            |      | 3          | 37.2934                                  |       |                   |                                                    |                                                   |
| L+S+TIBA   |      | 1          | 42.6357                                  | 42.64 | 0.92              | a                                                  | AB                                                |
|            |      | 2          | 41.0374                                  |       |                   |                                                    |                                                   |
|            |      | 3          | 44.2340                                  |       |                   |                                                    |                                                   |
| L+S+BBO    |      | 1          | 44.1082                                  | 44.79 | 0.80              | a                                                  | A                                                 |
|            |      | 2          | 46.3848                                  |       |                   |                                                    |                                                   |
|            |      | 3          | 43.8679                                  |       |                   |                                                    |                                                   |

### O<sub>2</sub><sup>-</sup> content (Figure S4a)

| Treatments | Time | repetition | O <sub>2</sub> <sup>-</sup> content<br>( μg·g <sup>-1</sup> Fw) | mean  | standard<br>error | significant<br>difference<br>between<br>treatments | significant<br>difference<br>between<br>full data |
|------------|------|------------|-----------------------------------------------------------------|-------|-------------------|----------------------------------------------------|---------------------------------------------------|
| CK         | 24h  | 1          | 9.202                                                           | 9.38  | 0.10              | c                                                  | E                                                 |
|            |      | 2          | 9.565                                                           |       |                   |                                                    |                                                   |
|            |      | 3          | 9.384                                                           |       |                   |                                                    |                                                   |
| L          |      | 1          | 15.046                                                          | 14.16 | 0.45              | a                                                  | B                                                 |
|            |      | 2          | 13.577                                                          |       |                   |                                                    |                                                   |
|            |      | 3          | 13.847                                                          |       |                   |                                                    |                                                   |
| L+S        |      | 1          | 9.755                                                           | 9.57  | 0.11              | c                                                  | E                                                 |
|            |      | 2          | 9.572                                                           |       |                   |                                                    |                                                   |
|            |      | 3          | 9.389                                                           |       |                   |                                                    |                                                   |
| L+S+TIBA   |      | 1          | 14.846                                                          | 14.31 | 0.31              | a                                                  | B                                                 |
|            |      | 2          | 14.305                                                          |       |                   |                                                    |                                                   |
|            |      | 3          | 13.764                                                          |       |                   |                                                    |                                                   |
| L+S+BBO    |      | 1          | 11.194                                                          | 11.49 | 0.30              | b                                                  | D                                                 |
|            |      | 2          | 11.192                                                          |       |                   |                                                    |                                                   |
|            |      | 3          | 12.085                                                          |       |                   |                                                    |                                                   |
| CK         | 48h  | 1          | 9.601                                                           | 9.60  | 0.19              | d                                                  | E                                                 |
|            |      | 2          | 9.931                                                           |       |                   |                                                    |                                                   |
|            |      | 3          | 9.272                                                           |       |                   |                                                    |                                                   |
| L          |      | 1          | 16.716                                                          | 16.28 | 0.25              | a                                                  | A                                                 |
|            |      | 2          | 16.280                                                          |       |                   |                                                    |                                                   |
|            |      | 3          | 15.845                                                          |       |                   |                                                    |                                                   |
| L+S        |      | 1          | 9.990                                                           | 9.91  | 0.23              | d                                                  | E                                                 |
|            |      | 2          | 10.262                                                          |       |                   |                                                    |                                                   |
|            |      | 3          | 9.484                                                           |       |                   |                                                    |                                                   |
| L+S+TIBA   |      | 1          | 12.576                                                          | 12.29 | 0.18              | b                                                  | C                                                 |
|            |      | 2          | 12.332                                                          |       |                   |                                                    |                                                   |
|            |      | 3          | 11.953                                                          |       |                   |                                                    |                                                   |
| L+S+BBO    |      | 1          | 11.624                                                          | 11.62 | 0.12              | c                                                  | CD                                                |
|            |      | 2          | 11.412                                                          |       |                   |                                                    |                                                   |
|            |      | 3          | 11.835                                                          |       |                   |                                                    |                                                   |

**H<sub>2</sub>O<sub>2</sub> content (Figure S4c)**

| Treatments | Time | repetition | H <sub>2</sub> O <sub>2</sub><br>( mmol g <sup>-1</sup> Fw) | mean  | standard<br>error | significant<br>difference<br>between<br>treatments | significant<br>difference<br>between<br>full data |
|------------|------|------------|-------------------------------------------------------------|-------|-------------------|----------------------------------------------------|---------------------------------------------------|
| CK         | 24 h | 1          | 11.203                                                      | 11.26 | 0.12              | d                                                  | G                                                 |
|            |      | 2          | 11.489                                                      |       |                   |                                                    |                                                   |
|            |      | 3          | 11.084                                                      |       |                   |                                                    |                                                   |
| L          |      | 1          | 16.480                                                      | 16.60 | 0.07              | a                                                  | A                                                 |
|            |      | 2          | 16.598                                                      |       |                   |                                                    |                                                   |
|            |      | 3          | 16.716                                                      |       |                   |                                                    |                                                   |
| L+S        |      | 1          | 13.447                                                      | 13.71 | 0.21              | c                                                  | E                                                 |
|            |      | 2          | 14.125                                                      |       |                   |                                                    |                                                   |
|            |      | 3          | 13.556                                                      |       |                   |                                                    |                                                   |
| L+S+TIBA   |      | 1          | 15.098                                                      | 15.11 | 0.01              | b                                                  | C                                                 |
|            |      | 2          | 15.124                                                      |       |                   |                                                    |                                                   |
|            |      | 3          | 15.111                                                      |       |                   |                                                    |                                                   |
| L+S+BBO    |      | 1          | 15.148                                                      | 15.15 | 0.02              | b                                                  | C                                                 |
|            |      | 2          | 15.179                                                      |       |                   |                                                    |                                                   |
|            |      | 3          | 15.117                                                      |       |                   |                                                    |                                                   |
| CK         | 48 h | 1          | 12.993                                                      | 12.92 | 0.04              | d                                                  | F                                                 |
|            |      | 2          | 12.853                                                      |       |                   |                                                    |                                                   |
|            |      | 3          | 12.923                                                      |       |                   |                                                    |                                                   |
| L          |      | 1          | 15.722                                                      | 15.41 | 0.18              | b                                                  | C                                                 |
|            |      | 2          | 15.098                                                      |       |                   |                                                    |                                                   |
|            |      | 3          | 15.410                                                      |       |                   |                                                    |                                                   |
| L+S        |      | 1          | 14.125                                                      | 14.18 | 0.08              | c                                                  | D                                                 |
|            |      | 2          | 14.087                                                      |       |                   |                                                    |                                                   |
|            |      | 3          | 14.337                                                      |       |                   |                                                    |                                                   |
| L+S+TIBA   |      | 1          | 16.442                                                      | 16.12 | 0.36              | a                                                  | B                                                 |
|            |      | 2          | 15.407                                                      |       |                   |                                                    |                                                   |
|            |      | 3          | 16.507                                                      |       |                   |                                                    |                                                   |
| L+S+BBO    |      | 1          | 15.573                                                      | 15.30 | 0.16              | b                                                  | C                                                 |
|            |      | 2          | 15.029                                                      |       |                   |                                                    |                                                   |
|            |      | 3          | 15.301                                                      |       |                   |                                                    |                                                   |



**SOD activity (Figure S5a)**

| Treatments | Time | repetition | SOD activity<br>( $\mu\text{mol g}^{-1} \text{ min}^{-1} \text{ Fw}$ ) | mean | standard<br>error | significant<br>difference<br>between<br>treatments | significant<br>difference<br>between<br>full data |
|------------|------|------------|------------------------------------------------------------------------|------|-------------------|----------------------------------------------------|---------------------------------------------------|
| CK         | 24h  | 1          | 5.74                                                                   | 5.99 | 0.34              | c                                                  | EF                                                |
|            |      | 2          | 5.57                                                                   |      |                   |                                                    |                                                   |
|            |      | 3          | 6.67                                                                   |      |                   |                                                    |                                                   |
| L          |      | 1          | 6.61                                                                   | 7.10 | 0.27              | b                                                  | BCD                                               |
|            |      | 2          | 7.13                                                                   |      |                   |                                                    |                                                   |
|            |      | 3          | 7.56                                                                   |      |                   |                                                    |                                                   |
| L+S        |      | 1          | 8.99                                                                   | 8.99 | 0.08              | a                                                  | A                                                 |
|            |      | 2          | 9.13                                                                   |      |                   |                                                    |                                                   |
|            |      | 3          | 8.85                                                                   |      |                   |                                                    |                                                   |
| L+S+TIBA   |      | 1          | 7.26                                                                   | 6.89 | 0.42              | b                                                  | CD                                                |
|            |      | 2          | 7.36                                                                   |      |                   |                                                    |                                                   |
|            |      | 3          | 6.04                                                                   |      |                   |                                                    |                                                   |
| L+S+BBO    |      | 1          | 7.33                                                                   | 7.30 | 0.02              | b                                                  | BC                                                |
|            |      | 2          | 7.27                                                                   |      |                   |                                                    |                                                   |
|            |      | 3          | 7.30                                                                   |      |                   |                                                    |                                                   |
| CK         | 48h  | 1          | 6.37                                                                   | 6.58 | 0.12              | b                                                  | DE                                                |
|            |      | 2          | 6.58                                                                   |      |                   |                                                    |                                                   |
|            |      | 3          | 6.78                                                                   |      |                   |                                                    |                                                   |
| L          |      | 1          | 5.31                                                                   | 5.63 | 0.21              | d                                                  | F                                                 |
|            |      | 2          | 5.56                                                                   |      |                   |                                                    |                                                   |
|            |      | 3          | 6.02                                                                   |      |                   |                                                    |                                                   |
| L+S        |      | 1          | 7.73                                                                   | 7.63 | 0.05              | a                                                  | B                                                 |
|            |      | 2          | 7.54                                                                   |      |                   |                                                    |                                                   |
|            |      | 3          | 7.63                                                                   |      |                   |                                                    |                                                   |
| L+S+TIBA   |      | 1          | 6.09                                                                   | 6.08 | 0.17              | cd                                                 | EF                                                |
|            |      | 2          | 5.78                                                                   |      |                   |                                                    |                                                   |
|            |      | 3          | 6.38                                                                   |      |                   |                                                    |                                                   |
| L+S+BBO    |      | 1          | 6.42                                                                   | 6.20 | 0.12              | bc                                                 | EF                                                |
|            |      | 2          | 6.20                                                                   |      |                   |                                                    |                                                   |
|            |      | 3          | 5.99                                                                   |      |                   |                                                    |                                                   |

**POD activity (Figure S5b)**

| Treatments | Time | repetition | POD activity<br>( $\mu\text{mol}\cdot\text{g}^{-1}\text{ min}^{-1}$<br>Fw) | mean  | standard<br>error | significant<br>difference<br>between<br>treatments | significant<br>difference<br>between<br>full data |
|------------|------|------------|----------------------------------------------------------------------------|-------|-------------------|----------------------------------------------------|---------------------------------------------------|
| CK         | 24h  | 1          | 41.04                                                                      | 39.84 | 0.67              | b                                                  | DE                                                |
|            |      | 2          | 38.73                                                                      |       |                   |                                                    |                                                   |
|            |      | 3          | 39.76                                                                      |       |                   |                                                    |                                                   |
| L          |      | 1          | 38.67                                                                      | 39.30 | 0.36              | b                                                  | E                                                 |
|            |      | 2          | 39.30                                                                      |       |                   |                                                    |                                                   |
|            |      | 3          | 39.93                                                                      |       |                   |                                                    |                                                   |
| L+S        |      | 1          | 43.89                                                                      | 43.51 | 0.21              | a                                                  | B                                                 |
|            |      | 2          | 43.47                                                                      |       |                   |                                                    |                                                   |
|            |      | 3          | 43.17                                                                      |       |                   |                                                    |                                                   |
| L+S+TIBA   |      | 1          | 38.29                                                                      | 39.20 | 0.46              | b                                                  | E                                                 |
|            |      | 2          | 39.61                                                                      |       |                   |                                                    |                                                   |
|            |      | 3          | 39.71                                                                      |       |                   |                                                    |                                                   |
| L+S+BBO    |      | 1          | 35.46                                                                      | 35.75 | 0.46              | c                                                  | F                                                 |
|            |      | 2          | 36.65                                                                      |       |                   |                                                    |                                                   |
|            |      | 3          | 35.13                                                                      |       |                   |                                                    |                                                   |
| CK         | 48h  | 1          | 42.50                                                                      | 41.99 | 0.63              | b                                                  | BC                                                |
|            |      | 2          | 42.72                                                                      |       |                   |                                                    |                                                   |
|            |      | 3          | 40.74                                                                      |       |                   |                                                    |                                                   |
| L          |      | 1          | 40.33                                                                      | 39.81 | 0.30              | c                                                  | DE                                                |
|            |      | 2          | 39.81                                                                      |       |                   |                                                    |                                                   |
|            |      | 3          | 39.30                                                                      |       |                   |                                                    |                                                   |
| L+S        |      | 1          | 47.93                                                                      | 47.18 | 0.38              | a                                                  | A                                                 |
|            |      | 2          | 46.86                                                                      |       |                   |                                                    |                                                   |
|            |      | 3          | 46.75                                                                      |       |                   |                                                    |                                                   |
| L+S+TIBA   |      | 1          | 41.75                                                                      | 41.54 | 0.27              | bc                                                 | CD                                                |
|            |      | 2          | 41.00                                                                      |       |                   |                                                    |                                                   |
|            |      | 3          | 41.88                                                                      |       |                   |                                                    |                                                   |
| L+S+BBO    |      | 1          | 42.15                                                                      | 40.42 | 1.22              | bc                                                 | CDE                                               |
|            |      | 2          | 41.05                                                                      |       |                   |                                                    |                                                   |
|            |      | 3          | 38.06                                                                      |       |                   |                                                    |                                                   |

**CAT activity (Figure S5c)**

| Treatments | Time | repetition | CAT activity<br>( $\mu\text{mol}\cdot\text{g}^{-1}\text{ min}^{-1}$<br>Fw) | mean | standard<br>error | significant<br>difference<br>between<br>treatments | significant<br>difference<br>between<br>full data |
|------------|------|------------|----------------------------------------------------------------------------|------|-------------------|----------------------------------------------------|---------------------------------------------------|
| CK         | 24h  | 1          | 0.57                                                                       | 0.62 | 0.03              | c                                                  | F                                                 |
|            |      | 2          | 0.64                                                                       |      |                   |                                                    |                                                   |
|            |      | 3          | 0.65                                                                       |      |                   |                                                    |                                                   |
| L          |      | 1          | 0.92                                                                       | 0.92 | 0.01              | a                                                  | B                                                 |
|            |      | 2          | 0.93                                                                       |      |                   |                                                    |                                                   |
|            |      | 3          | 0.91                                                                       |      |                   |                                                    |                                                   |
| L+S        |      | 1          | 0.98                                                                       | 0.97 | 0.01              | a                                                  | A                                                 |
|            |      | 2          | 0.97                                                                       |      |                   |                                                    |                                                   |
|            |      | 3          | 0.96                                                                       |      |                   |                                                    |                                                   |
| L+S+TIBA   |      | 1          | 0.84                                                                       | 0.79 | 0.03              | b                                                  | E                                                 |
|            |      | 2          | 0.77                                                                       |      |                   |                                                    |                                                   |
|            |      | 3          | 0.76                                                                       |      |                   |                                                    |                                                   |
| L+S+BBO    |      | 1          | 0.83                                                                       | 0.83 | 0.01              | b                                                  | DE                                                |
|            |      | 2          | 0.84                                                                       |      |                   |                                                    |                                                   |
|            |      | 3          | 0.82                                                                       |      |                   |                                                    |                                                   |
| CK         | 48h  | 1          | 0.59                                                                       | 0.58 | 0.01              | d                                                  | F                                                 |
|            |      | 2          | 0.58                                                                       |      |                   |                                                    |                                                   |
|            |      | 3          | 0.57                                                                       |      |                   |                                                    |                                                   |
| L          |      | 1          | 0.91                                                                       | 0.91 | 0.01              | b                                                  | BC                                                |
|            |      | 2          | 0.93                                                                       |      |                   |                                                    |                                                   |
|            |      | 3          | 0.89                                                                       |      |                   |                                                    |                                                   |
| L+S        |      | 1          | 1.00                                                                       | 1.01 | 0.03              | a                                                  | A                                                 |
|            |      | 2          | 1.06                                                                       |      |                   |                                                    |                                                   |
|            |      | 3          | 0.97                                                                       |      |                   |                                                    |                                                   |
| L+S+TIBA   |      | 1          | 0.84                                                                       | 0.85 | 0.01              | c                                                  | DE                                                |
|            |      | 2          | 0.85                                                                       |      |                   |                                                    |                                                   |
|            |      | 3          | 0.86                                                                       |      |                   |                                                    |                                                   |
| L+S+BBO    |      | 1          | 0.89                                                                       | 0.87 | 0.02              | bc                                                 | CD                                                |
|            |      | 2          | 0.88                                                                       |      |                   |                                                    |                                                   |
|            |      | 3          | 0.84                                                                       |      |                   |                                                    |                                                   |

### APX activity (Figure S6a)

| Treatments | Time | repetition | APXactivity<br>( $\mu\text{mol}\cdot\text{g}^{-1}\text{ min}^{-1}$<br>Fw) | mean  | standard<br>error | significant<br>difference<br>between<br>treatments | significant<br>difference<br>between<br>full data |
|------------|------|------------|---------------------------------------------------------------------------|-------|-------------------|----------------------------------------------------|---------------------------------------------------|
| CK         | 24 h | 1          | 15.32                                                                     | 15.11 | 0.12              | b                                                  | B                                                 |
|            |      | 2          | 15.11                                                                     |       |                   |                                                    |                                                   |
|            |      | 3          | 14.90                                                                     |       |                   |                                                    |                                                   |
| L          |      | 1          | 16.14                                                                     | 16.09 | 0.05              | a                                                  | A                                                 |
|            |      | 2          | 15.99                                                                     |       |                   |                                                    |                                                   |
|            |      | 3          | 16.14                                                                     |       |                   |                                                    |                                                   |
| L+S        |      | 1          | 16.02                                                                     | 16.08 | 0.04              | a                                                  | A                                                 |
|            |      | 2          | 16.06                                                                     |       |                   |                                                    |                                                   |
|            |      | 3          | 16.15                                                                     |       |                   |                                                    |                                                   |
| L+S+TIBA   |      | 1          | 14.70                                                                     | 15.07 | 0.21              | b                                                  | B                                                 |
|            |      | 2          | 15.43                                                                     |       |                   |                                                    |                                                   |
|            |      | 3          | 15.07                                                                     |       |                   |                                                    |                                                   |
| L+S+BBO    |      | 1          | 14.37                                                                     | 14.37 | 0.37              | c                                                  | C                                                 |
|            |      | 2          | 15.01                                                                     |       |                   |                                                    |                                                   |
|            |      | 3          | 13.74                                                                     |       |                   |                                                    |                                                   |
| CK         | 48 h | 1          | 14.73                                                                     | 14.99 | 0.13              | b                                                  | BC                                                |
|            |      | 2          | 15.08                                                                     |       |                   |                                                    |                                                   |
|            |      | 3          | 15.15                                                                     |       |                   |                                                    |                                                   |
| L          |      | 1          | 15.72                                                                     | 15.99 | 0.19              | a                                                  | A                                                 |
|            |      | 2          | 15.88                                                                     |       |                   |                                                    |                                                   |
|            |      | 3          | 16.36                                                                     |       |                   |                                                    |                                                   |
| L+S        |      | 1          | 16.18                                                                     | 16.18 | 0.04              | a                                                  | A                                                 |
|            |      | 2          | 16.25                                                                     |       |                   |                                                    |                                                   |
|            |      | 3          | 16.10                                                                     |       |                   |                                                    |                                                   |
| L+S+TIBA   |      | 1          | 13.10                                                                     | 13.03 | 0.29              | c                                                  | D                                                 |
|            |      | 2          | 13.49                                                                     |       |                   |                                                    |                                                   |
|            |      | 3          | 12.50                                                                     |       |                   |                                                    |                                                   |
| L+S+BBO    |      | 1          | 10.82                                                                     | 11.19 | 0.35              | d                                                  | E                                                 |
|            |      | 2          | 11.89                                                                     |       |                   |                                                    |                                                   |
|            |      | 3          | 10.87                                                                     |       |                   |                                                    |                                                   |

### MDHAR activity (Figure S6b)

| Treatments | Time | repetition | MDHAR activity<br>( $\text{nmol g}^{-1} \text{min}^{-1}$<br>Fw) | mean   | standard<br>error | significant<br>difference<br>between<br>treatments | significant<br>difference<br>between<br>full data |
|------------|------|------------|-----------------------------------------------------------------|--------|-------------------|----------------------------------------------------|---------------------------------------------------|
| CK         | 24h  | 1          | 116.30                                                          | 121.04 | 3.60              | c                                                  | D                                                 |
|            |      | 2          | 128.10                                                          |        |                   |                                                    |                                                   |
|            |      | 3          | 118.72                                                          |        |                   |                                                    |                                                   |
| L          |      | 1          | 142.71                                                          | 134.19 | 4.26              | b                                                  | C                                                 |
|            |      | 2          | 130.10                                                          |        |                   |                                                    |                                                   |
|            |      | 3          | 129.77                                                          |        |                   |                                                    |                                                   |
| L+S        |      | 1          | 179.86                                                          | 176.79 | 1.69              | a                                                  | B                                                 |
|            |      | 2          | 176.46                                                          |        |                   |                                                    |                                                   |
|            |      | 3          | 174.04                                                          |        |                   |                                                    |                                                   |
| L+S+TIBA   |      | 1          | 134.19                                                          | 134.19 | 2.70              | b                                                  | C                                                 |
|            |      | 2          | 129.51                                                          |        |                   |                                                    |                                                   |
|            |      | 3          | 138.86                                                          |        |                   |                                                    |                                                   |
| L+S+BBO    |      | 1          | 131.13                                                          | 136.20 | 2.57              | b                                                  | C                                                 |
|            |      | 2          | 139.49                                                          |        |                   |                                                    |                                                   |
|            |      | 3          | 137.98                                                          |        |                   |                                                    |                                                   |
| CK         | 48h  | 1          | 128.60                                                          | 128.60 | 0.43              | b                                                  | C                                                 |
|            |      | 2          | 129.34                                                          |        |                   |                                                    |                                                   |
|            |      | 3          | 127.85                                                          |        |                   |                                                    |                                                   |
| L          |      | 1          | 116.60                                                          | 117.18 | 0.33              | c                                                  | D                                                 |
|            |      | 2          | 117.73                                                          |        |                   |                                                    |                                                   |
|            |      | 3          | 117.20                                                          |        |                   |                                                    |                                                   |
| L+S        |      | 1          | 190.32                                                          | 195.97 | 3.35              | a                                                  | A                                                 |
|            |      | 2          | 195.67                                                          |        |                   |                                                    |                                                   |
|            |      | 3          | 201.92                                                          |        |                   |                                                    |                                                   |
| L+S+TIBA   |      | 1          | 120.84                                                          | 119.13 | 0.99              | c                                                  | D                                                 |
|            |      | 2          | 117.42                                                          |        |                   |                                                    |                                                   |
|            |      | 3          | 119.13                                                          |        |                   |                                                    |                                                   |
| L+S+BBO    |      | 1          | 115.64                                                          | 118.72 | 1.78              | c                                                  | D                                                 |
|            |      | 2          | 118.72                                                          |        |                   |                                                    |                                                   |
|            |      | 3          | 121.80                                                          |        |                   |                                                    |                                                   |

**DHAR activity (Figure S6c)**

| Treatments | Time | repetition | DHAR activity<br>( $\mu\text{mol}\cdot\text{g}^{-1}\cdot\text{min}^{-1}$<br>Fw) | mean | standard<br>error | significant<br>difference<br>between<br>treatments | significant<br>difference<br>between<br>full data |
|------------|------|------------|---------------------------------------------------------------------------------|------|-------------------|----------------------------------------------------|---------------------------------------------------|
| CK         | 24h  | 1          | 0.19                                                                            | 0.18 | 0.01              | b                                                  | B                                                 |
|            |      | 2          | 0.16                                                                            |      |                   |                                                    |                                                   |
|            |      | 3          | 0.19                                                                            |      |                   |                                                    |                                                   |
| L          |      | 1          | 0.15                                                                            | 0.14 | 0.01              | c                                                  | D                                                 |
|            |      | 2          | 0.12                                                                            |      |                   |                                                    |                                                   |
|            |      | 3          | 0.16                                                                            |      |                   |                                                    |                                                   |
| L+S        |      | 1          | 0.22                                                                            | 0.22 | 0.00              | a                                                  | A                                                 |
|            |      | 2          | 0.22                                                                            |      |                   |                                                    |                                                   |
|            |      | 3          | 0.22                                                                            |      |                   |                                                    |                                                   |
| L+S+TIBA   |      | 1          | 0.19                                                                            | 0.19 | 0.00              | b                                                  | B                                                 |
|            |      | 2          | 0.19                                                                            |      |                   |                                                    |                                                   |
|            |      | 3          | 0.19                                                                            |      |                   |                                                    |                                                   |
| L+S+BBO    |      | 1          | 0.16                                                                            | 0.18 | 0.01              | b                                                  | B                                                 |
|            |      | 2          | 0.19                                                                            |      |                   |                                                    |                                                   |
|            |      | 3          | 0.18                                                                            |      |                   |                                                    |                                                   |
| CK         | 48h  | 1          | 0.14                                                                            | 0.15 | 0.01              | b                                                  | CD                                                |
|            |      | 2          | 0.15                                                                            |      |                   |                                                    |                                                   |
|            |      | 3          | 0.16                                                                            |      |                   |                                                    |                                                   |
| L          |      | 1          | 0.16                                                                            | 0.17 | 0.01              | b                                                  | BC                                                |
|            |      | 2          | 0.17                                                                            |      |                   |                                                    |                                                   |
|            |      | 3          | 0.19                                                                            |      |                   |                                                    |                                                   |
| L+S        |      | 1          | 0.21                                                                            | 0.22 | 0.01              | a                                                  | A                                                 |
|            |      | 2          | 0.22                                                                            |      |                   |                                                    |                                                   |
|            |      | 3          | 0.23                                                                            |      |                   |                                                    |                                                   |
| L+S+TIBA   |      | 1          | 0.07                                                                            | 0.09 | 0.01              | c                                                  | E                                                 |
|            |      | 2          | 0.11                                                                            |      |                   |                                                    |                                                   |
|            |      | 3          | 0.09                                                                            |      |                   |                                                    |                                                   |
| L+S+BBO    |      | 1          | 0.10                                                                            | 0.11 | 0.01              | c                                                  | E                                                 |
|            |      | 2          | 0.12                                                                            |      |                   |                                                    |                                                   |
|            |      | 3          | 0.12                                                                            |      |                   |                                                    |                                                   |

### GR activity (Figure S6d)

| Treatments | Time | repetition | GR activity<br>( $\text{nmol} \cdot \text{g}^{-1} \cdot \text{min}^{-1}$<br>Fw) | mean   | standard<br>error | significant<br>difference<br>between<br>treatments | significant<br>difference<br>between<br>full data |
|------------|------|------------|---------------------------------------------------------------------------------|--------|-------------------|----------------------------------------------------|---------------------------------------------------|
| CK         | 24h  | 1          | 102.21                                                                          | 103.24 | 0.61              | b                                                  | A                                                 |
|            |      | 2          | 103.19                                                                          |        |                   |                                                    |                                                   |
|            |      | 3          | 104.33                                                                          |        |                   |                                                    |                                                   |
| L          |      | 1          | 93.39                                                                           | 92.69  | 0.40              | c                                                  | B                                                 |
|            |      | 2          | 92.69                                                                           |        |                   |                                                    |                                                   |
|            |      | 3          | 91.99                                                                           |        |                   |                                                    |                                                   |
| L+S        |      | 1          | 114.54                                                                          | 110.90 | 2.91              | a                                                  | A                                                 |
|            |      | 2          | 113.01                                                                          |        |                   |                                                    |                                                   |
|            |      | 3          | 105.15                                                                          |        |                   |                                                    |                                                   |
| L+S+TIBA   |      | 1          | 74.63                                                                           | 76.96  | 1.35              | d                                                  | C                                                 |
|            |      | 2          | 79.29                                                                           |        |                   |                                                    |                                                   |
|            |      | 3          | 76.96                                                                           |        |                   |                                                    |                                                   |
| L+S+BBO    |      | 1          | 61.27                                                                           | 64.44  | 1.60              | e                                                  | D                                                 |
|            |      | 2          | 66.38                                                                           |        |                   |                                                    |                                                   |
|            |      | 3          | 65.66                                                                           |        |                   |                                                    |                                                   |
| CK         | 48h  | 1          | 87.08                                                                           | 91.88  | 3.20              | b                                                  | B                                                 |
|            |      | 2          | 97.94                                                                           |        |                   |                                                    |                                                   |
|            |      | 3          | 90.63                                                                           |        |                   |                                                    |                                                   |
| L          |      | 1          | 59.43                                                                           | 63.84  | 4.13              | c                                                  | D                                                 |
|            |      | 2          | 60.00                                                                           |        |                   |                                                    |                                                   |
|            |      | 3          | 72.09                                                                           |        |                   |                                                    |                                                   |
| L+S        |      | 1          | 108.34                                                                          | 108.62 | 0.16              | a                                                  | A                                                 |
|            |      | 2          | 108.62                                                                          |        |                   |                                                    |                                                   |
|            |      | 3          | 108.89                                                                          |        |                   |                                                    |                                                   |
| L+S+TIBA   |      | 1          | 55.22                                                                           | 56.39  | 2.00              | c                                                  | D                                                 |
|            |      | 2          | 53.66                                                                           |        |                   |                                                    |                                                   |
|            |      | 3          | 60.28                                                                           |        |                   |                                                    |                                                   |
| L+S+BBO    |      | 1          | 71.14                                                                           | 60.56  | 5.29              | c                                                  | D                                                 |
|            |      | 2          | 54.89                                                                           |        |                   |                                                    |                                                   |
|            |      | 3          | 55.66                                                                           |        |                   |                                                    |                                                   |

**AsA content (Figure S7a)**

| Treatments | Time | repetition | AsA content<br>( mg g-1 Fw) | mean | standard<br>error | significant<br>difference<br>between<br>treatments | significant<br>difference<br>between<br>full data |
|------------|------|------------|-----------------------------|------|-------------------|----------------------------------------------------|---------------------------------------------------|
| CK         | 24h  | 1          | 0.538                       | 0.55 | 0.02              | d                                                  | F                                                 |
|            |      | 2          | 0.592                       |      |                   |                                                    |                                                   |
|            |      | 3          | 0.517                       |      |                   |                                                    |                                                   |
| L          |      | 1          | 0.654                       | 0.64 | 0.01              | c                                                  | E                                                 |
|            |      | 2          | 0.643                       |      |                   |                                                    |                                                   |
|            |      | 3          | 0.631                       |      |                   |                                                    |                                                   |
| L+S        |      | 1          | 0.952                       | 0.92 | 0.02              | a                                                  | B                                                 |
|            |      | 2          | 0.898                       |      |                   |                                                    |                                                   |
|            |      | 3          | 0.906                       |      |                   |                                                    |                                                   |
| L+S+TIBA   |      | 1          | 0.645                       | 0.70 | 0.04              | c                                                  | DE                                                |
|            |      | 2          | 0.780                       |      |                   |                                                    |                                                   |
|            |      | 3          | 0.680                       |      |                   |                                                    |                                                   |
| L+S+BBO    |      | 1          | 0.775                       | 0.78 | 0.00              | b                                                  | CD                                                |
|            |      | 2          | 0.777                       |      |                   |                                                    |                                                   |
|            |      | 3          | 0.773                       |      |                   |                                                    |                                                   |
| CK         | 48h  | 1          | 0.768                       | 0.72 | 0.03              | b                                                  | DE                                                |
|            |      | 2          | 0.716                       |      |                   |                                                    |                                                   |
|            |      | 3          | 0.664                       |      |                   |                                                    |                                                   |
| L          |      | 1          | 0.910                       | 0.86 | 0.03              | b                                                  | B                                                 |
|            |      | 2          | 0.845                       |      |                   |                                                    |                                                   |
|            |      | 3          | 0.821                       |      |                   |                                                    |                                                   |
| L+S        |      | 1          | 1.007                       | 1.01 | 0.01              | a                                                  | A                                                 |
|            |      | 2          | 1.024                       |      |                   |                                                    |                                                   |
|            |      | 3          | 0.984                       |      |                   |                                                    |                                                   |
| L+S+TIBA   |      | 1          | 0.806                       | 0.84 | 0.03              | b                                                  | BC                                                |
|            |      | 2          | 0.905                       |      |                   |                                                    |                                                   |
|            |      | 3          | 0.816                       |      |                   |                                                    |                                                   |
| L+S+BBO    |      | 1          | 0.867                       | 0.86 | 0.04              | b                                                  | B                                                 |
|            |      | 2          | 0.792                       |      |                   |                                                    |                                                   |
|            |      | 3          | 0.927                       |      |                   |                                                    |                                                   |



### DHA content (Figure S7b)

| Treatments | Time | repetition | DHA<br>content<br>( mg g <sup>-1</sup> Fw) | mean | standard<br>error | significant<br>difference<br>between<br>treatments | significant<br>difference<br>between<br>full data |
|------------|------|------------|--------------------------------------------|------|-------------------|----------------------------------------------------|---------------------------------------------------|
| CK         | 24h  | 1          | 0.657                                      | 0.61 | 0.03              | a                                                  | C                                                 |
|            |      | 2          | 0.546                                      |      |                   |                                                    |                                                   |
|            |      | 3          | 0.635                                      |      |                   |                                                    |                                                   |
| L          |      | 1          | 0.621                                      | 0.66 | 0.02              | a                                                  | C                                                 |
|            |      | 2          | 0.701                                      |      |                   |                                                    |                                                   |
|            |      | 3          | 0.661                                      |      |                   |                                                    |                                                   |
| L+S        |      | 1          | 0.368                                      | 0.42 | 0.04              | b                                                  | D                                                 |
|            |      | 2          | 0.389                                      |      |                   |                                                    |                                                   |
|            |      | 3          | 0.507                                      |      |                   |                                                    |                                                   |
| L+S+TIBA   |      | 1          | 0.670                                      | 0.68 | 0.02              | a                                                  | C                                                 |
|            |      | 2          | 0.649                                      |      |                   |                                                    |                                                   |
|            |      | 3          | 0.718                                      |      |                   |                                                    |                                                   |
| L+S+BBO    |      | 1          | 0.582                                      | 0.64 | 0.04              | a                                                  | C                                                 |
|            |      | 2          | 0.632                                      |      |                   |                                                    |                                                   |
|            |      | 3          | 0.712                                      |      |                   |                                                    |                                                   |
| CK         | 48h  | 1          | 0.605                                      | 0.61 | 0.00              | c                                                  | C                                                 |
|            |      | 2          | 0.614                                      |      |                   |                                                    |                                                   |
|            |      | 3          | 0.610                                      |      |                   |                                                    |                                                   |
| L          |      | 1          | 0.665                                      | 0.71 | 0.05              | bc                                                 | BC                                                |
|            |      | 2          | 0.655                                      |      |                   |                                                    |                                                   |
|            |      | 3          | 0.817                                      |      |                   |                                                    |                                                   |
| L+S        |      | 1          | 0.446                                      | 0.44 | 0.00              | d                                                  | D                                                 |
|            |      | 2          | 0.433                                      |      |                   |                                                    |                                                   |
|            |      | 3          | 0.439                                      |      |                   |                                                    |                                                   |
| L+S+TIBA   |      | 1          | 0.885                                      | 0.84 | 0.02              | a                                                  | A                                                 |
|            |      | 2          | 0.799                                      |      |                   |                                                    |                                                   |
|            |      | 3          | 0.842                                      |      |                   |                                                    |                                                   |
| L+S+BBO    |      | 1          | 0.735                                      | 0.78 | 0.04              | ab                                                 | AB                                                |
|            |      | 2          | 0.855                                      |      |                   |                                                    |                                                   |
|            |      | 3          | 0.747                                      |      |                   |                                                    |                                                   |

**AsA/DHA (Figure S7c)**

| Treatments | Time | repetition | AsA/DHA | mean | standard error | significant difference between treatments | significant difference between full data |
|------------|------|------------|---------|------|----------------|-------------------------------------------|------------------------------------------|
| CK         | 24h  | 1          | 0.819   | 0.82 | 0.00           | c                                         | D                                        |
|            |      | 2          | 0.817   |      |                |                                           |                                          |
|            |      | 3          | 0.815   |      |                |                                           |                                          |
| L          |      | 1          | 1.053   | 1.03 | 0.06           | b                                         | CD                                       |
|            |      | 2          | 0.917   |      |                |                                           |                                          |
|            |      | 3          | 1.133   |      |                |                                           |                                          |
| L+S        |      | 1          | 2.588   | 2.45 | 0.08           | a                                         | A                                        |
|            |      | 2          | 2.307   |      |                |                                           |                                          |
|            |      | 3          | 2.448   |      |                |                                           |                                          |
| L+S+TIBA   |      | 1          | 0.963   | 1.04 | 0.08           | b                                         | CD                                       |
|            |      | 2          | 1.202   |      |                |                                           |                                          |
|            |      | 3          | 0.947   |      |                |                                           |                                          |
| L+S+BBO    |      | 1          | 1.379   | 1.23 | 0.08           | b                                         | C                                        |
|            |      | 2          | 1.229   |      |                |                                           |                                          |
|            |      | 3          | 1.086   |      |                |                                           |                                          |
| CK         | 48h  | 1          | 1.537   | 1.51 | 0.10           | b                                         | B                                        |
|            |      | 2          | 1.675   |      |                |                                           |                                          |
|            |      | 3          | 1.323   |      |                |                                           |                                          |
| L          |      | 1          | 1.368   | 1.22 | 0.11           | c                                         | C                                        |
|            |      | 2          | 1.289   |      |                |                                           |                                          |
|            |      | 3          | 1.005   |      |                |                                           |                                          |
| L+S        |      | 1          | 2.259   | 2.31 | 0.03           | a                                         | A                                        |
|            |      | 2          | 2.365   |      |                |                                           |                                          |
|            |      | 3          | 2.312   |      |                |                                           |                                          |
| L+S+TIBA   |      | 1          | 0.911   | 1.00 | 0.07           | c                                         | CD                                       |
|            |      | 2          | 1.133   |      |                |                                           |                                          |
|            |      | 3          | 0.969   |      |                |                                           |                                          |
| L+S+BBO    |      | 1          | 1.179   | 1.12 | 0.10           | c                                         | C                                        |
|            |      | 2          | 0.925   |      |                |                                           |                                          |
|            |      | 3          | 1.242   |      |                |                                           |                                          |

**GSH content (Figure S7d)**

| Treatments | Time | repetition | GSH<br>( $\mu\text{mol}\cdot\text{g}^{-1}$ Fw) | mean  | standard<br>error | significant<br>difference<br>between<br>treatments | significant<br>difference<br>between<br>full data |
|------------|------|------------|------------------------------------------------|-------|-------------------|----------------------------------------------------|---------------------------------------------------|
| CK         | 24h  | 1          | 32.63                                          | 31.99 | 0.37              | b                                                  | B                                                 |
|            |      | 2          | 31.34                                          |       |                   |                                                    |                                                   |
|            |      | 3          | 31.99                                          |       |                   |                                                    |                                                   |
| L          |      | 1          | 32.46                                          | 32.46 | 0.00              | b                                                  | B                                                 |
|            |      | 2          | 32.46                                          |       |                   |                                                    |                                                   |
|            |      | 3          | 32.46                                          |       |                   |                                                    |                                                   |
| L+S        |      | 1          | 42.77                                          | 39.76 | 1.51              | a                                                  | A                                                 |
|            |      | 2          | 38.02                                          |       |                   |                                                    |                                                   |
|            |      | 3          | 38.50                                          |       |                   |                                                    |                                                   |
| L+S+TIBA   |      | 1          | 28.66                                          | 31.43 | 1.40              | b                                                  | B                                                 |
|            |      | 2          | 32.45                                          |       |                   |                                                    |                                                   |
|            |      | 3          | 33.18                                          |       |                   |                                                    |                                                   |
| L+S+BBO    |      | 1          | 25.32                                          | 26.15 | 0.99              | c                                                  | D                                                 |
|            |      | 2          | 25.01                                          |       |                   |                                                    |                                                   |
|            |      | 3          | 28.11                                          |       |                   |                                                    |                                                   |
| CK         | 48h  | 1          | 26.30                                          | 30.00 | 2.38              | bc                                                 | BC                                                |
|            |      | 2          | 29.26                                          |       |                   |                                                    |                                                   |
|            |      | 3          | 34.43                                          |       |                   |                                                    |                                                   |
| L          |      | 1          | 30.75                                          | 31.84 | 0.63              | b                                                  | B                                                 |
|            |      | 2          | 31.84                                          |       |                   |                                                    |                                                   |
|            |      | 3          | 32.93                                          |       |                   |                                                    |                                                   |
| L+S        |      | 1          | 41.75                                          | 41.05 | 1.20              | a                                                  | A                                                 |
|            |      | 2          | 38.72                                          |       |                   |                                                    |                                                   |
|            |      | 3          | 42.68                                          |       |                   |                                                    |                                                   |
| L+S+TIBA   |      | 1          | 25.89                                          | 27.30 | 0.81              | cd                                                 | CD                                                |
|            |      | 2          | 27.30                                          |       |                   |                                                    |                                                   |
|            |      | 3          | 28.70                                          |       |                   |                                                    |                                                   |
| L+S+BBO    |      | 1          | 25.02                                          | 24.69 | 0.16              | d                                                  | D                                                 |
|            |      | 2          | 24.52                                          |       |                   |                                                    |                                                   |
|            |      | 3          | 24.54                                          |       |                   |                                                    |                                                   |

**GSSG content (Figure S7e)**

| Treatments | Time | repetition | GSSG<br>( $\mu\text{mol} \cdot \text{g}^{-1} \cdot \text{Fw}$ ) | mean  | standard<br>error | significant<br>difference<br>between<br>treatments | significant<br>difference<br>between<br>full data |
|------------|------|------------|-----------------------------------------------------------------|-------|-------------------|----------------------------------------------------|---------------------------------------------------|
| CK         | 24h  | 1          | 11.66                                                           | 11.44 | 0.13              | c                                                  | E                                                 |
|            |      | 2          | 11.44                                                           |       |                   |                                                    |                                                   |
|            |      | 3          | 11.21                                                           |       |                   |                                                    |                                                   |
| L          |      | 1          | 14.11                                                           | 14.11 | 0.10              | a                                                  | A                                                 |
|            |      | 2          | 13.93                                                           |       |                   |                                                    |                                                   |
|            |      | 3          | 14.28                                                           |       |                   |                                                    |                                                   |
| L+S        |      | 1          | 11.30                                                           | 11.55 | 0.14              | c                                                  | E                                                 |
|            |      | 2          | 11.80                                                           |       |                   |                                                    |                                                   |
|            |      | 3          | 11.55                                                           |       |                   |                                                    |                                                   |
| L+S+TIBA   |      | 1          | 12.09                                                           | 12.67 | 0.62              | b                                                  | CD                                                |
|            |      | 2          | 12.01                                                           |       |                   |                                                    |                                                   |
|            |      | 3          | 13.92                                                           |       |                   |                                                    |                                                   |
| L+S+BBO    |      | 1          | 12.80                                                           | 12.80 | 0.02              | b                                                  | CD                                                |
|            |      | 2          | 12.76                                                           |       |                   |                                                    |                                                   |
|            |      | 3          | 12.83                                                           |       |                   |                                                    |                                                   |
| CK         | 48h  | 1          | 12.19                                                           | 12.21 | 0.06              | c                                                  | DE                                                |
|            |      | 2          | 12.32                                                           |       |                   |                                                    |                                                   |
|            |      | 3          | 12.11                                                           |       |                   |                                                    |                                                   |
| L          |      | 1          | 14.30                                                           | 14.26 | 0.03              | a                                                  | A                                                 |
|            |      | 2          | 14.26                                                           |       |                   |                                                    |                                                   |
|            |      | 3          | 14.21                                                           |       |                   |                                                    |                                                   |
| L+S        |      | 1          | 13.56                                                           | 13.32 | 0.17              | b                                                  | BC                                                |
|            |      | 2          | 12.98                                                           |       |                   |                                                    |                                                   |
|            |      | 3          | 13.41                                                           |       |                   |                                                    |                                                   |
| L+S+TIBA   |      | 1          | 13.75                                                           | 13.98 | 0.22              | a                                                  | AB                                                |
|            |      | 2          | 14.42                                                           |       |                   |                                                    |                                                   |
|            |      | 3          | 13.77                                                           |       |                   |                                                    |                                                   |
| L+S+BBO    |      | 1          | 14.11                                                           | 14.32 | 0.33              | a                                                  | A                                                 |
|            |      | 2          | 13.88                                                           |       |                   |                                                    |                                                   |
|            |      | 3          | 14.98                                                           |       |                   |                                                    |                                                   |

**GSH/GSSG (Figure S7f)**

| Treatments | Time | repetition | GSH/GSSG | mean | standard error | significant difference between treatments | significant difference between full data |
|------------|------|------------|----------|------|----------------|-------------------------------------------|------------------------------------------|
| CK         | 24h  | 1          | 2.798    | 2.84 | 0.02           | b                                         | BC                                       |
|            |      | 2          | 2.881    |      |                |                                           |                                          |
|            |      | 3          | 2.839    |      |                |                                           |                                          |
| L          |      | 1          | 2.166    | 2.17 | 0.09           | cd                                        | F                                        |
|            |      | 2          | 2.330    |      |                |                                           |                                          |
|            |      | 3          | 2.003    |      |                |                                           |                                          |
| L+S        |      | 1          | 3.784    | 3.45 | 0.17           | a                                         | A                                        |
|            |      | 2          | 3.223    |      |                |                                           |                                          |
|            |      | 3          | 3.333    |      |                |                                           |                                          |
| L+S+TIBA   |      | 1          | 2.370    | 2.49 | 0.11           | c                                         | DE                                       |
|            |      | 2          | 2.702    |      |                |                                           |                                          |
|            |      | 3          | 2.384    |      |                |                                           |                                          |
| L+S+BBO    |      | 1          | 2.076    | 2.08 | 0.07           | d                                         | F                                        |
|            |      | 2          | 1.960    |      |                |                                           |                                          |
|            |      | 3          | 2.190    |      |                |                                           |                                          |
| CK         | 48h  | 1          | 2.610    | 2.61 | 0.14           | b                                         | CD                                       |
|            |      | 2          | 2.376    |      |                |                                           |                                          |
|            |      | 3          | 2.844    |      |                |                                           |                                          |
| L          |      | 1          | 2.151    | 2.23 | 0.05           | c                                         | EF                                       |
|            |      | 2          | 2.234    |      |                |                                           |                                          |
|            |      | 3          | 2.317    |      |                |                                           |                                          |
| L+S        |      | 1          | 3.080    | 3.08 | 0.06           | a                                         | B                                        |
|            |      | 2          | 2.983    |      |                |                                           |                                          |
|            |      | 3          | 3.182    |      |                |                                           |                                          |
| L+S+TIBA   |      | 1          | 1.883    | 2.06 | 0.10           | c                                         | F                                        |
|            |      | 2          | 2.225    |      |                |                                           |                                          |
|            |      | 3          | 2.084    |      |                |                                           |                                          |
| L+S+BBO    |      | 1          | 1.773    | 1.73 | 0.04           | d                                         | G                                        |
|            |      | 2          | 1.767    |      |                |                                           |                                          |
|            |      | 3          | 1.639    |      |                |                                           |                                          |

### G6PDH activity (Figure S8)

| Treatments | Time | repetition | G6PDH activity<br>( $\mu\text{mol g}^{-1} \text{min}^{-1}$<br>Fw) | mean   | standard<br>error | significant<br>difference<br>between<br>treatments | significant<br>difference<br>between<br>full data |
|------------|------|------------|-------------------------------------------------------------------|--------|-------------------|----------------------------------------------------|---------------------------------------------------|
| CK         | 24h  | 1          | 85.64                                                             | 90.21  | 5.48              | d                                                  | G                                                 |
|            |      | 2          | 83.87                                                             |        |                   |                                                    |                                                   |
|            |      | 3          | 101.11                                                            |        |                   |                                                    |                                                   |
| L          |      | 1          | 122.83                                                            | 122.33 | 1.09              | bc                                                 | D                                                 |
|            |      | 2          | 120.24                                                            |        |                   |                                                    |                                                   |
|            |      | 3          | 123.93                                                            |        |                   |                                                    |                                                   |
| L+S        |      | 1          | 158.24                                                            | 151.54 | 3.46              | a                                                  | B                                                 |
|            |      | 2          | 146.69                                                            |        |                   |                                                    |                                                   |
|            |      | 3          | 149.69                                                            |        |                   |                                                    |                                                   |
| L+S+TIBA   |      | 1          | 84.42                                                             | 96.12  | 5.94              | d                                                  | FG                                                |
|            |      | 2          | 103.76                                                            |        |                   |                                                    |                                                   |
|            |      | 3          | 100.17                                                            |        |                   |                                                    |                                                   |
| L+S+BBO    |      | 1          | 116.76                                                            | 117.23 | 0.37              | c                                                  | DE                                                |
|            |      | 2          | 117.97                                                            |        |                   |                                                    |                                                   |
|            |      | 3          | 116.97                                                            |        |                   |                                                    |                                                   |
| CK         | 48h  | 1          | 81.94                                                             | 88.00  | 5.95              | d                                                  | G                                                 |
|            |      | 2          | 82.17                                                             |        |                   |                                                    |                                                   |
|            |      | 3          | 99.89                                                             |        |                   |                                                    |                                                   |
| L          |      | 1          | 141.07                                                            | 134.79 | 3.14              | b                                                  | C                                                 |
|            |      | 2          | 131.35                                                            |        |                   |                                                    |                                                   |
|            |      | 3          | 131.96                                                            |        |                   |                                                    |                                                   |
| L+S        |      | 1          | 172.76                                                            | 172.43 | 0.79              | a                                                  | A                                                 |
|            |      | 2          | 173.60                                                            |        |                   |                                                    |                                                   |
|            |      | 3          | 170.94                                                            |        |                   |                                                    |                                                   |
| L+S+TIBA   |      | 1          | 100.55                                                            | 108.03 | 6.87              | c                                                  | EF                                                |
|            |      | 2          | 101.79                                                            |        |                   |                                                    |                                                   |
|            |      | 3          | 121.76                                                            |        |                   |                                                    |                                                   |
| L+S+BBO    |      | 1          | 121.99                                                            | 116.80 | 2.60              | c                                                  | DE                                                |
|            |      | 2          | 114.20                                                            |        |                   |                                                    |                                                   |
|            |      | 3          | 114.20                                                            |        |                   |                                                    |                                                   |

**NADPH content (Figure S9a)**

| Treatments | Time | repetition | NADPH content<br>( $\mu\text{mol}\cdot\text{g}^{-1}\text{Fw}$ ) | mean | standard<br>error | significant<br>difference<br>between<br>treatments | significant<br>difference<br>between<br>full data |
|------------|------|------------|-----------------------------------------------------------------|------|-------------------|----------------------------------------------------|---------------------------------------------------|
| CK         | 24h  | 1          | 0.67                                                            | 0.65 | 0.03              | bc                                                 | CDE                                               |
|            |      | 2          | 0.68                                                            |      |                   |                                                    |                                                   |
|            |      | 3          | 0.59                                                            |      |                   |                                                    |                                                   |
| L          |      | 1          | 0.69                                                            | 0.70 | 0.02              | b                                                  | BC                                                |
|            |      | 2          | 0.67                                                            |      |                   |                                                    |                                                   |
|            |      | 3          | 0.74                                                            |      |                   |                                                    |                                                   |
| L+S        |      | 1          | 0.87                                                            | 0.92 | 0.03              | a                                                  | A                                                 |
|            |      | 2          | 0.92                                                            |      |                   |                                                    |                                                   |
|            |      | 3          | 0.97                                                            |      |                   |                                                    |                                                   |
| L+S+TIBA   |      | 1          | 0.60                                                            | 0.62 | 0.01              | c                                                  | E                                                 |
|            |      | 2          | 0.62                                                            |      |                   |                                                    |                                                   |
|            |      | 3          | 0.64                                                            |      |                   |                                                    |                                                   |
| L+S+BBO    |      | 1          | 0.68                                                            | 0.68 | 0.00              | b                                                  | CD                                                |
|            |      | 2          | 0.69                                                            |      |                   |                                                    |                                                   |
|            |      | 3          | 0.68                                                            |      |                   |                                                    |                                                   |
| CK         | 48h  | 1          | 0.70                                                            | 0.70 | 0.00              | b                                                  | CD                                                |
|            |      | 2          | 0.70                                                            |      |                   |                                                    |                                                   |
|            |      | 3          | 0.69                                                            |      |                   |                                                    |                                                   |
| L          |      | 1          | 0.71                                                            | 0.70 | 0.02              | b                                                  | BC                                                |
|            |      | 2          | 0.67                                                            |      |                   |                                                    |                                                   |
|            |      | 3          | 0.72                                                            |      |                   |                                                    |                                                   |
| L+S        |      | 1          | 0.77                                                            | 0.75 | 0.01              | a                                                  | B                                                 |
|            |      | 2          | 0.75                                                            |      |                   |                                                    |                                                   |
|            |      | 3          | 0.73                                                            |      |                   |                                                    |                                                   |
| L+S+TIBA   |      | 1          | 0.63                                                            | 0.65 | 0.01              | c                                                  | CDE                                               |
|            |      | 2          | 0.65                                                            |      |                   |                                                    |                                                   |
|            |      | 3          | 0.67                                                            |      |                   |                                                    |                                                   |
| L+S+BBO    |      | 1          | 0.64                                                            | 0.64 | 0.00              | c                                                  | DE                                                |
|            |      | 2          | 0.65                                                            |      |                   |                                                    |                                                   |
|            |      | 3          | 0.64                                                            |      |                   |                                                    |                                                   |

### NADPH/NADP<sup>+</sup> (Figure S9b)

| Treatments | Time | repetition | NADPH/NADP <sup>+</sup> | mean | standard error | significant difference between treatments | significant difference between full data |
|------------|------|------------|-------------------------|------|----------------|-------------------------------------------|------------------------------------------|
| CK         | 24h  | 1          | 2.286                   | 2.05 | 0.12           | bc                                        | BC                                       |
|            |      | 2          | 1.921                   |      |                |                                           |                                          |
|            |      | 3          | 1.934                   |      |                |                                           |                                          |
| L          |      | 1          | 2.281                   | 2.20 | 0.04           | b                                         | B                                        |
|            |      | 2          | 2.130                   |      |                |                                           |                                          |
|            |      | 3          | 2.201                   |      |                |                                           |                                          |
| L+S        |      | 1          | 2.842                   | 2.87 | 0.10           | a                                         | A                                        |
|            |      | 2          | 2.714                   |      |                |                                           |                                          |
|            |      | 3          | 3.054                   |      |                |                                           |                                          |
| L+S+TIBA   |      | 1          | 1.809                   | 1.79 | 0.01           | d                                         | CD                                       |
|            |      | 2          | 1.785                   |      |                |                                           |                                          |
|            |      | 3          | 1.761                   |      |                |                                           |                                          |
| L+S+BBO    |      | 1          | 2.000                   | 1.89 | 0.09           | cd                                        | CD                                       |
|            |      | 2          | 1.951                   |      |                |                                           |                                          |
|            |      | 3          | 1.714                   |      |                |                                           |                                          |
| CK         | 48h  | 1          | 2.372                   | 2.18 | 0.12           | a                                         | B                                        |
|            |      | 2          | 1.949                   |      |                |                                           |                                          |
|            |      | 3          | 2.212                   |      |                |                                           |                                          |
| L          |      | 1          | 1.711                   | 1.79 | 0.11           | b                                         | CD                                       |
|            |      | 2          | 1.653                   |      |                |                                           |                                          |
|            |      | 3          | 1.995                   |      |                |                                           |                                          |
| L+S        |      | 1          | 2.302                   | 2.25 | 0.04           | a                                         | B                                        |
|            |      | 2          | 2.285                   |      |                |                                           |                                          |
|            |      | 3          | 2.176                   |      |                |                                           |                                          |
| L+S+TIBA   |      | 1          | 1.656                   | 1.66 | 0.07           | b                                         | D                                        |
|            |      | 2          | 1.773                   |      |                |                                           |                                          |
|            |      | 3          | 1.547                   |      |                |                                           |                                          |
| L+S+BBO    |      | 1          | 1.650                   | 1.65 | 0.07           | b                                         | D                                        |
|            |      | 2          | 1.779                   |      |                |                                           |                                          |
|            |      | 3          | 1.525                   |      |                |                                           |                                          |
